# Supplementary material
Source: Springer Nature journal article supplement (https://www.springermedizin.de/resource/supplementary/13023_2011_327_MOESM1_ESM.pdf/9642118)

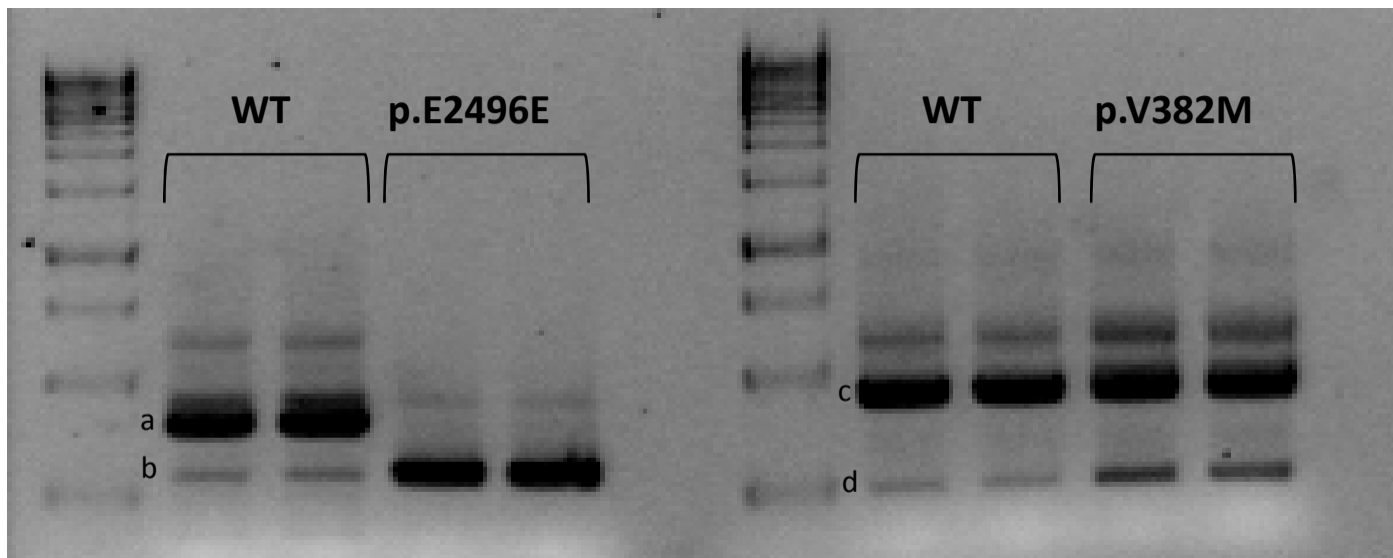

% MISSPLICING

14

14

79

83

7

5

22

16

Supplement: MOESM1 [file 9642118]
